# Supplementary material for: High genetic diversity and low differentiation retained in the European fragmented and declining Greater Spotted Eagle (Clanga clanga) population
Source: PubMed Central journal article supplement (PMC6395815; doi:10.1038/s41598-019-39187-1), 2019-02-28
Supplement: 41598_2019_39187_MOESM1_ESM.pdf [file 41598_2019_39187_MOESM1_ESM.pdf]

## **Supplementary Information**

### **High genetic diversity and low differentiation retained in the European fragmented and declining Greater Spotted Eagle (*Clanga clanga*) population**

Ülo Väli, Valery Dombrovski, Marina Dzmitranok, Grzegorz Maciorowski, Bernd-Ulrich

Meyburg

**Table S1.** List of studied nuclear markers

|                        | Length  | Na | Mean<br>Ne | He   | Ho   | Reference |
|------------------------|---------|----|------------|------|------|-----------|
| <b>Introns</b>         |         |    |            |      |      |           |
| ACP6                   | 807     | 4  | 2.00       | 0.21 | 0.15 | 1         |
| YME1L1                 | 874     | 3  | 1.75       | 0.08 | 0.09 | 1         |
| UBC6                   | 669     | 3  | 1.75       | 0.07 | 0.07 | 1         |
| ARHGEF9                | 713     | 5  | 2.75       | 0.28 | 0.30 | 1         |
| PSMC1                  | 951     | 9  | 4.25       | 0.62 | 0.74 | 1         |
| PDCD11                 | 706     | 9  | 4.00       | 0.50 | 0.41 | 1         |
| BZW1                   | 590     | 7  | 3.00       | 0.29 | 0.25 | 1         |
| EIF3J                  | 948     | 7  | 3.00       | 0.44 | 0.51 | 1         |
| CSNK2A2                | 689     | 6  | 3.75       | 0.57 | 0.54 | 1         |
| DDX42                  | 787     | 2  | 1.25       | 0.08 | 0.40 | 1         |
| <b>Microsatellites</b> |         |    |            |      |      |           |
| Aa02                   | 133_135 | 2  | 2.00       | 0.33 | 0.27 | 2         |
| Aa12                   | 123_141 | 10 | 4.75       | 0.44 | 0.36 | 2         |
| Aa15                   | 197_209 | 6  | 5.00       | 0.57 | 0.58 | 2         |
| Aa26                   | 146_170 | 9  | 5.50       | 0.58 | 0.61 | 2         |
| Aa27                   | 93_99   | 3  | 3.00       | 0.45 | 0.45 | 2         |
| Aa35                   | 249_267 | 9  | 7.25       | 0.75 | 0.67 | 2         |
| Aa39                   | 165_179 | 7  | 4.75       | 0.66 | 0.70 | 2         |
| Aa43                   | 112_132 | 10 | 6.75       | 0.76 | 0.74 | 2         |
| Aa49                   | 153_159 | 4  | 2.75       | 0.21 | 0.20 | 2         |
| Aa53                   | 130_144 | 7  | 5.75       | 0.72 | 0.73 | 2         |
| Aa57                   | 112_120 | 5  | 4.00       | 0.47 | 0.44 | 2         |
| Hal1                   | 116_120 | 2  | 2.00       | 0.41 | 0.41 | 3         |
| Hal4                   | 152_184 | 13 | 8.75       | 0.77 | 0.77 | 3         |
| Hal7                   | 143_155 | 5  | 3.75       | 0.56 | 0.57 | 3         |
| Hal9                   | 135_141 | 4  | 3.00       | 0.43 | 0.35 | 3         |
| Hal13                  | 150_154 | 3  | 2.25       | 0.31 | 0.33 | 3         |
| Hal18                  | 141_151 | 6  | 3.50       | 0.45 | 0.40 | 3         |
| IEAAAG04               | 214_226 | 4  | 3.50       | 0.61 | 0.67 | 4         |
| IEAAAG05               | 136_164 | 7  | 4.50       | 0.51 | 0.32 | 4         |
| IEAAAG11               | 332_396 | 15 | 8.25       | 0.83 | 0.73 | 4         |
| IEAAAG12               | 130_146 | 5  | 4.50       | 0.65 | 0.71 | 4         |
| IEAAAG13               | 242_258 | 5  | 4.00       | 0.50 | 0.45 | 4         |
| IEAAAG14               | 204_212 | 3  | 3.00       | 0.47 | 0.53 | 4         |
| IEAAAG15               | 126_142 | 5  | 3.75       | 0.59 | 0.67 | 4         |

References. 1 - Backström, N., Fagerberg, S., Ellegren, H. 2008. Genomics of natural bird populations: a gene-based set of reference markers evenly spread across the avian genome. *Mol. Ecol.* 17, 964–980.; 2 Martínez-Cruz, B., David, V.A., Godoy, J.A., Negro, J.J., O'Brien, S.J., & Johnson, W.E. 2002. Eighteen polymorphic microsatellite markers for the highly endangered Spanish Imperial Eagle (*Aquila adalberti*) and related species. *Mol. Ecol. Res.* 2, 323–326.; 3 - Hailer, F., Gautschi, B., & Helander, B. 2005. Development and multiplex PCR amplification of novel microsatellite markers in the Whitetailed Sea Eagle, *Haliaeetus albicilla* (Aves: Falconiformes, Accipitridae). *Mol. Ecol. Res.* 5, 938–940.; 5 - Busch, J. D., Katzner, T. E., Bragin, E. & Keim, P. 2005. Tetranucleotide microsatellites for *Aquila* and *Haliaeetus* eagles. *Mol. Ecol. Res.* 5, 39–41.

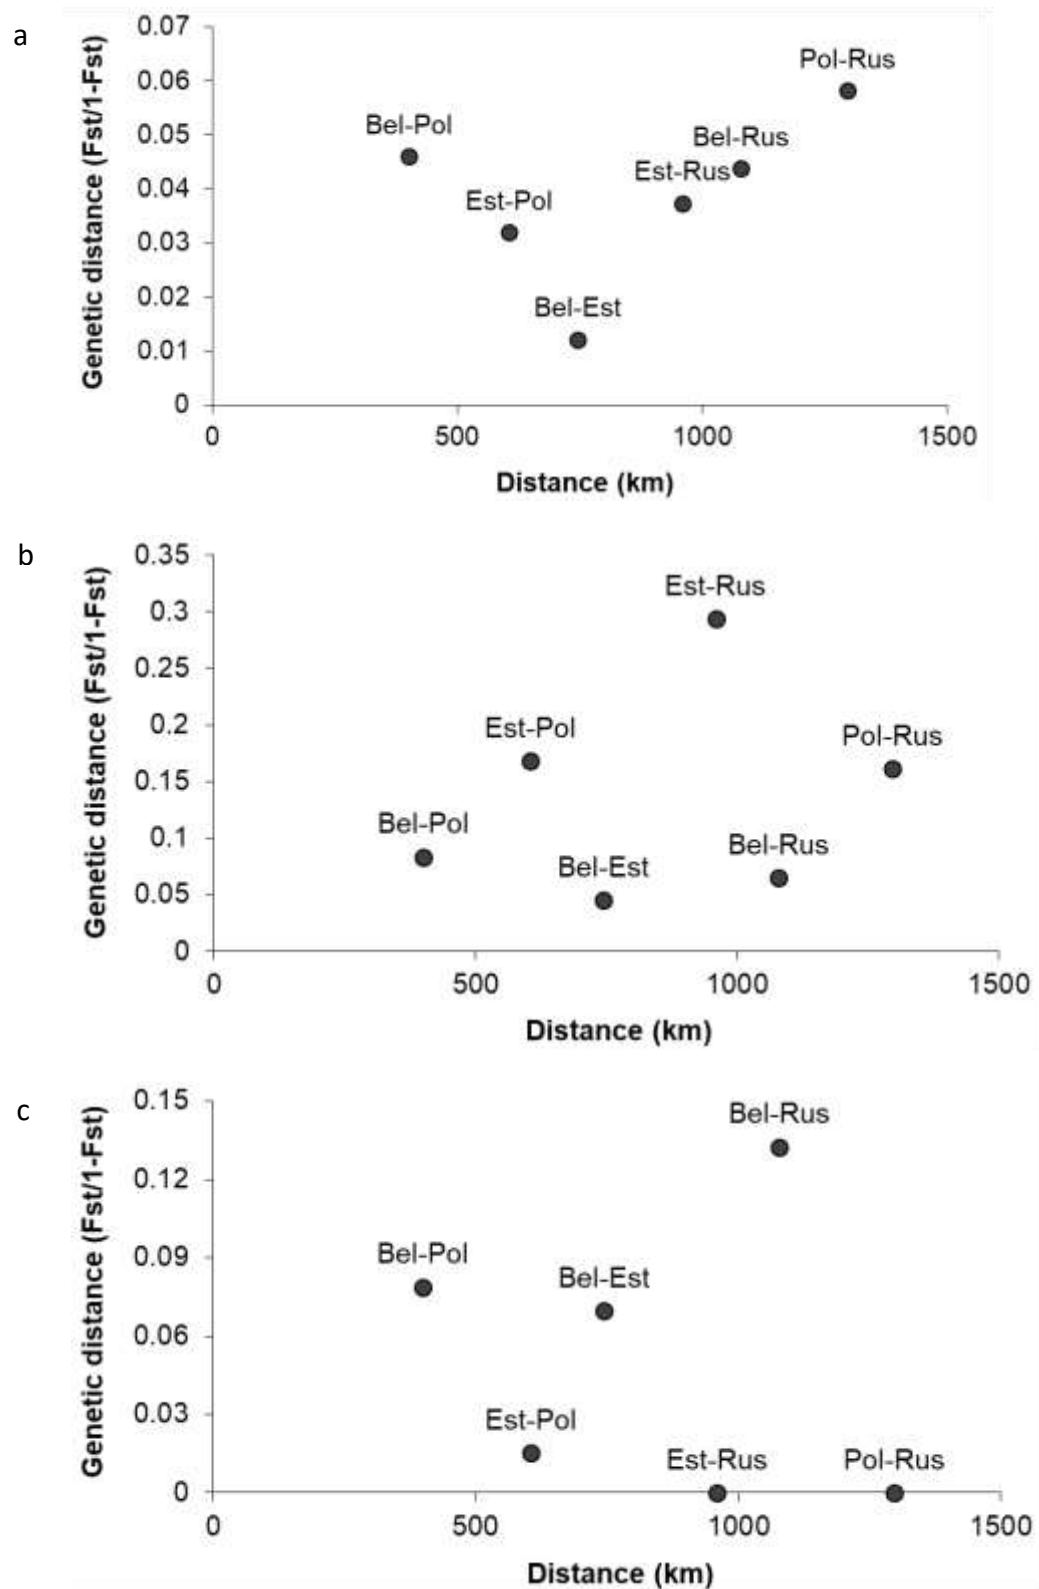

**Figure S1.** Relationships between genetic and geographic distances among four Greater Spotted Eagle populations using (a) microsatellites, (b) introns and (c) mtDNA

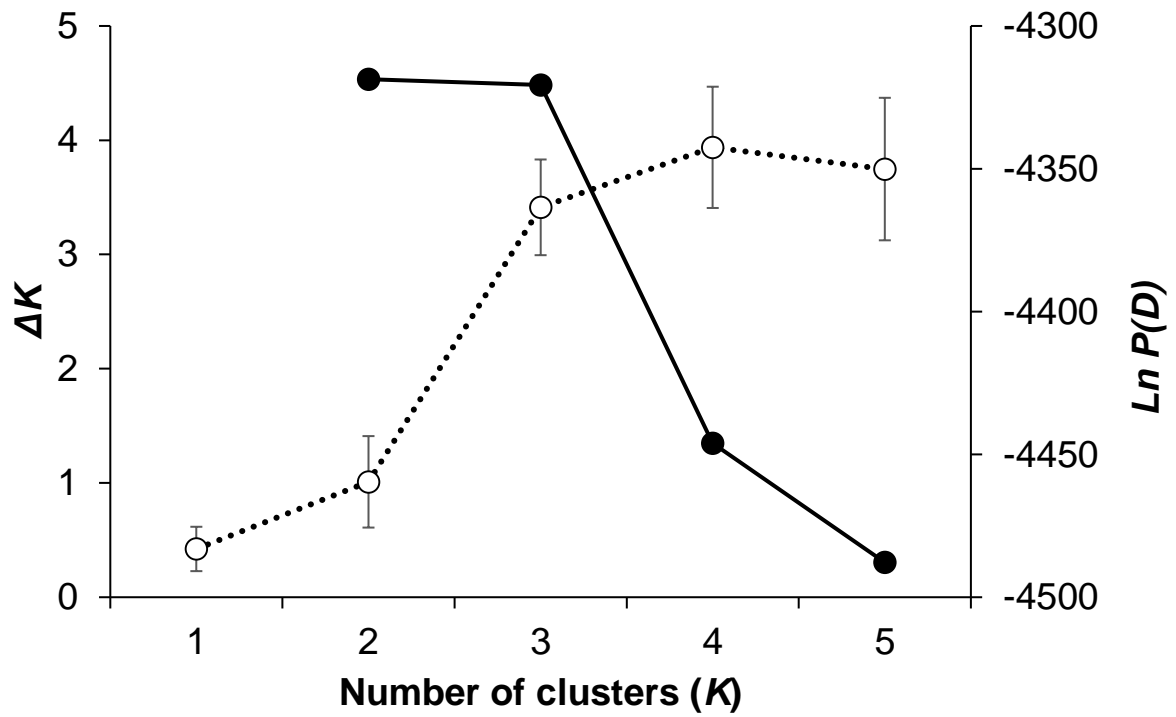

**Figure S2.** Suggested number of clusters according to  $\Delta K$  (filled circles) and log posterior probability of  $K$  ( $\ln P(D)$ ; to ease comparison, absolute values are presented, empty circles) by the microsatellite analysis

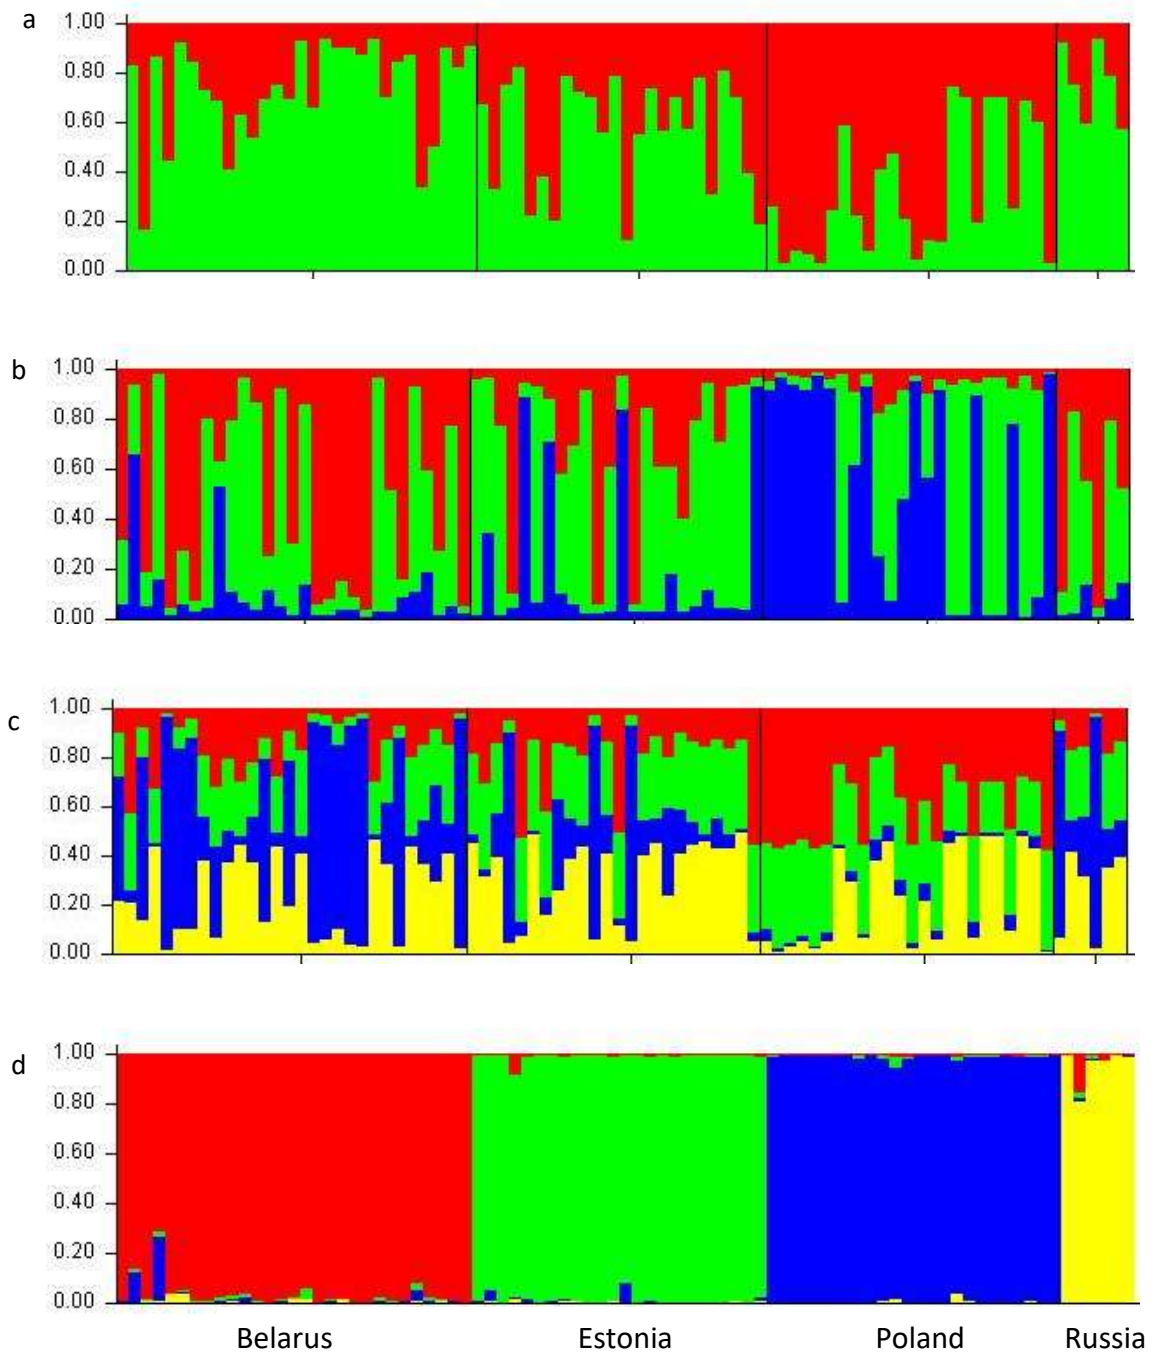

**Figure S3.** Assignment of individuals from four Greater Spotted Eagle populations into: (a) two, (b) three, or (c) four putative groups according to STRUCTURE analysis without prior information on actual population; and (d) detection of potential recent migrants by assignment of individuals into four putative populations with prior population information. The assignments are based on the of microsatellite genotypes.

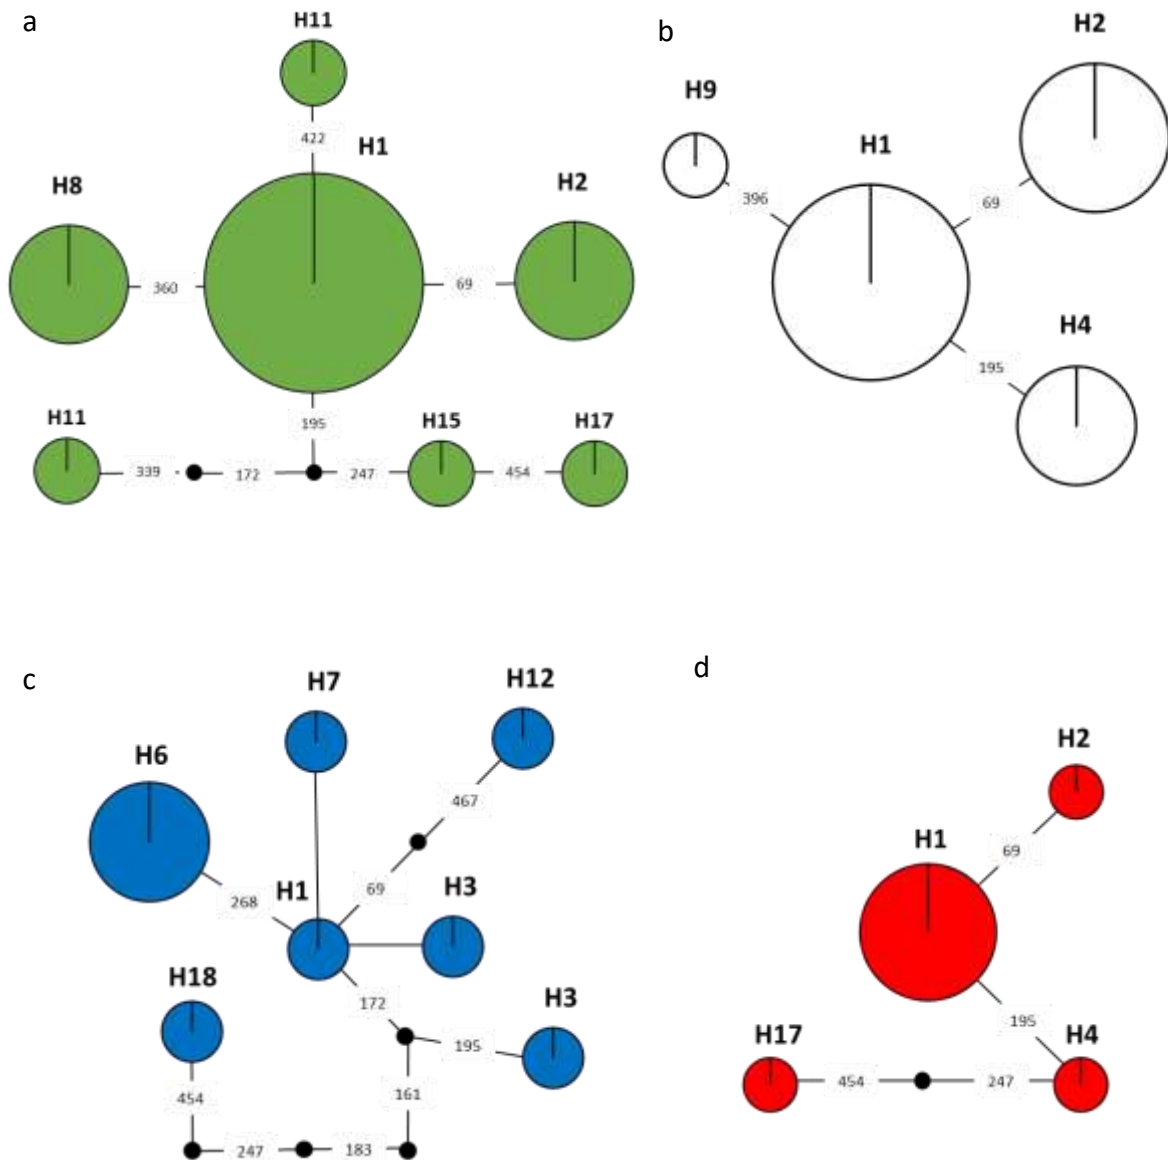

**Figure S4.** Median joining networks of mtDNA haplotypes from (a) Southern Belarus, (b)

Poland, (c) Estonia and (d) Russia. Circle size is proportional to haplotype frequency.

Haplotype labels are indicated as in Fig. 2, on connections defining mutations are presented.

Indels were not included in the calculation of the network.

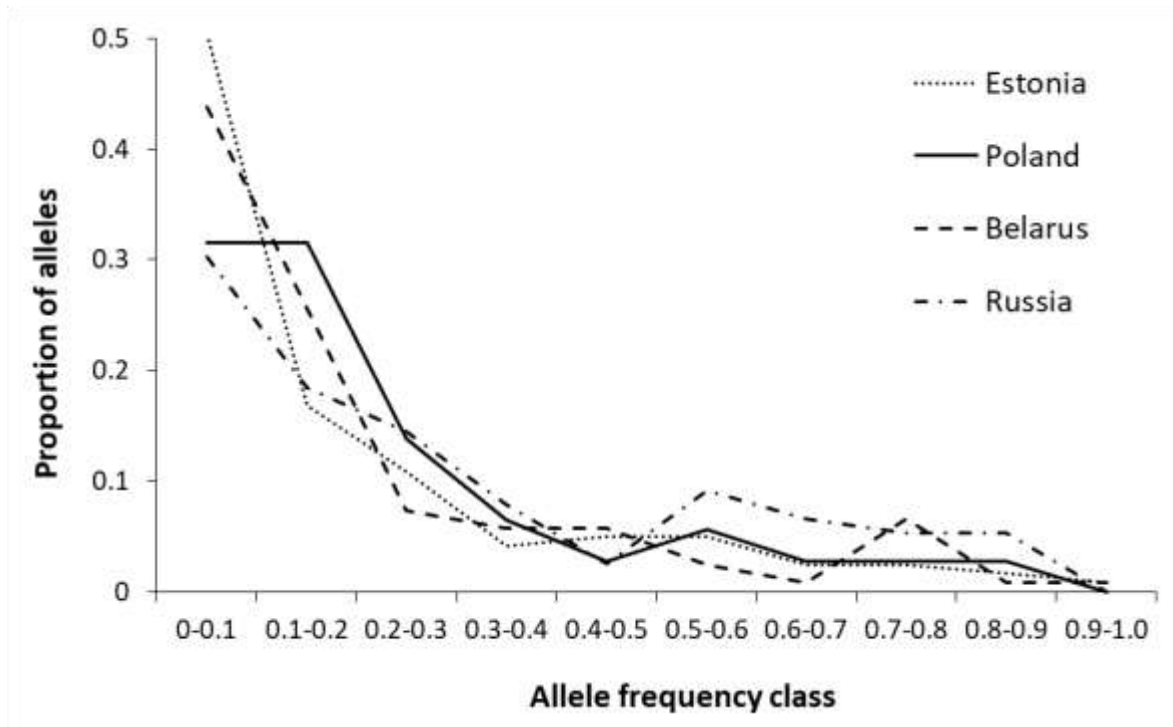

**Figure S5.** Microsatellite allele frequency distributions in four Greater Spotted Eagle populations.
